# Supplementary material
Source: PubMed Central journal article supplement (PMC2901437)
Supplement: 1006991107_pnas.201006991SI.pdf [file 1006991107_pnas.201006991SI.pdf]

# Supporting Information

Romero et al. 10.1073/pnas.1006991107

**Table S1. Variables in the best GLMM explaining the occurrence of consolation according to conflict characteristics**

| Variables           | Variance | $\beta$ | SE    | z      | P      | OR   | 95% CI    |
|---------------------|----------|---------|-------|--------|--------|------|-----------|
| Fixed               |          |         |       |        |        |      |           |
| Intercept           |          | -0.488  | 0.338 | -1.443 | 0.149  |      |           |
| Reconciliation      |          | -0.781  | 0.175 | -4.448 | <0.001 | 0.46 | 0.33–0.64 |
| Victim's rank       |          |         |       |        |        |      |           |
| High vs. low rank   |          | 0.724   | 0.354 | 2.047  | 0.040  | 2.06 | 1.03–4.13 |
| Medium vs. low rank |          | 0.849   | 0.302 | 2.812  | 0.004  | 2.33 | 1.29–4.22 |
| Random              |          |         |       |        |        |      |           |
| Victim              | 0.3141   |         |       |        |        |      |           |
| Aggressor           | 0.0221   |         |       |        |        |      |           |

OR, odds ratio; CI, confidence interval.

**Table S2. Variables in the best GLMM explaining the occurrence of consolation according to consoler and recipients characteristics**

| Variables                               | Variance | $\beta$ | SE    | z      | P      | OR   | 95% CI    |
|-----------------------------------------|----------|---------|-------|--------|--------|------|-----------|
| Fixed                                   |          |         |       |        |        |      |           |
| Intercept                               |          | -3.490  | 0.374 | -9.313 | <0.001 |      |           |
| Kinship                                 |          | 1.189   | 0.163 | -7.287 | <0.001 | 0.30 | 0.22–0.42 |
| Affiliation level                       |          | 0.370   | 0.134 | 2.756  | 0.005  | 1.44 | 1.11–1.88 |
| Consoler's sex                          |          | 1.507   | 0.450 | 3.347  | <0.001 | 4.51 | 1.86–10.9 |
| Consoler's sex $\times$ consoler's rank |          |         |       |        |        |      |           |
| Medium-rank female vs. high-rank female |          | 0.697   | 0.440 | 1.584  | 0.113  | 2.01 | 0.84–4.76 |
| Medium-rank male vs. high-rank male     |          | -1.901  | 0.496 | -3.831 | <0.001 | 0.15 | 0.05–0.30 |
| Low-rank female vs. high-rank female    |          | 0.158   | 0.350 | 0.452  | 0.651  | 1.17 | 0.59–2.33 |
| Low-rank male vs. high-rank male        |          | -1.634  | 0.388 | -4.206 | <0.001 | 0.19 | 0.09–0.41 |
| Random                                  |          |         |       |        |        |      |           |
| Victim                                  | 0.3602   |         |       |        |        |      |           |
| Consoler                                | 0.1167   |         |       |        |        |      |           |

OR, odds ratio; CI, confidence interval.
